# Supplementary material for: Phenol-Enriched Virgin Olive Oil Promotes Macrophage-Specific Reverse Cholesterol Transport In Vivo
Source: PubMed Central journal article supplement (PMC7460104; doi:10.3390/biomedicines8080266), 2020-08-03
Supplement: biomedicines-08-00266-s001.pdf [file biomedicines-08-00266-s001.pdf]

**Table S1.** Daily ingested dose of hydroxytyrosol and its derivatives through refined olive oil (ROO), functional virgin olive oil (FVOO), and phenolic extract (PE).

| Phenol (mg/kg body weight)              | ROO         | FVOO        | PE          |
|-----------------------------------------|-------------|-------------|-------------|
| Hydroxytyrosol                          | 0.01        | 0.06        | 0.14        |
| 3,4-DHPEA-AC                            | 0.00        | 0.23        | 0.03        |
| 3,4-DHPEA-EDA                           | 0.01        | 1.85        | 2.29        |
| 3,4-DHPEA-EA                            | 0.03        | 0.20        | 0.26        |
| <b>Total hydroxytyrosol derivatives</b> | <b>0.05</b> | <b>2.33</b> | <b>2.71</b> |

3,4-DHPEA-AC: 3,4-dihydroxyphenyl ethyl acetate (hydroxytyrosol acetate); 3,4-DHPEA-EA: 3,4-dihydroxyphenylethanol-elenolic acid (oleuropein aglycone); 3,4-DHPEA-EDA: 3,4-dihydroxyphenylethanol-elenolic acid dialdehyde (dialdehydic form of elenolic acid linked to hydroxytyrosol). Values are expressed as mg/kg body weight.

**Table S2.** Fatty acid compositions of refined olive oil (ROO) and functional virgin olive oil (FVOO).

| Fatty acids (%)              |                    | ROO          | FVOO         |
|------------------------------|--------------------|--------------|--------------|
| Caprylic acid                | C8:0               | 0.00         | 0.00         |
| Capric acid                  | C10:0              | 0.00         | 0.00         |
| Lauric acid                  | C12:0              | 0.00         | 0.00         |
| Myristic acid                | C14:0              | 0.00         | 0.00         |
| Palmitic acid                | C16:0              | 11.96        | 11.96        |
| Margaric acid                | C17:0              | 0.06         | 0.06         |
| Stearic acid                 | C18:0              | 3.08         | 3.08         |
| Arachidic acid               | C20:0              | 0.41         | 0.41         |
| Behenic acid                 | C22:0              | 0.11         | 0.11         |
| Lignoceric acid              | C24:0              | 0.05         | 0.05         |
| <b>Total saturated</b>       |                    | <b>15.67</b> | <b>15.67</b> |
| Palmitoleic acid             | c 9-C16:1          | 1.00         | 1.00         |
| Oleic acid                   | c 9-C18:1          | 72.71        | 72.71        |
| Gadoleic acid                | c 11-C20:1         | 0.25         | 0.25         |
| <b>Total monounsaturated</b> |                    | <b>73.96</b> | <b>73.96</b> |
| Linoleic acid                | c 9,12-C18:2       | 9.39         | 9.39         |
| Timnodonic acid              | C18:5 n3           | 0.20         | 0.20         |
| Linolenic acid               | c 9,12,15-C18:3 n3 | 0.54         | 0.54         |
| Eicosatetraenoic acid        | c 8,11,14-C20:3 n6 | 0.00         | 0.00         |
| <b>Total polyunsaturated</b> |                    | <b>10.13</b> | <b>10.13</b> |

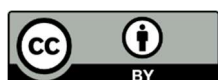

© 2020 by the authors. Submitted for possible open access publication under the terms and conditions of the Creative Commons Attribution (CC BY) license (<http://creativecommons.org/licenses/by/4.0/>).
